# Supplementary material
Source: PubMed Central journal article supplement (PMC4580559)

## Supplementary Figure 1. Cohort Selection Criteria

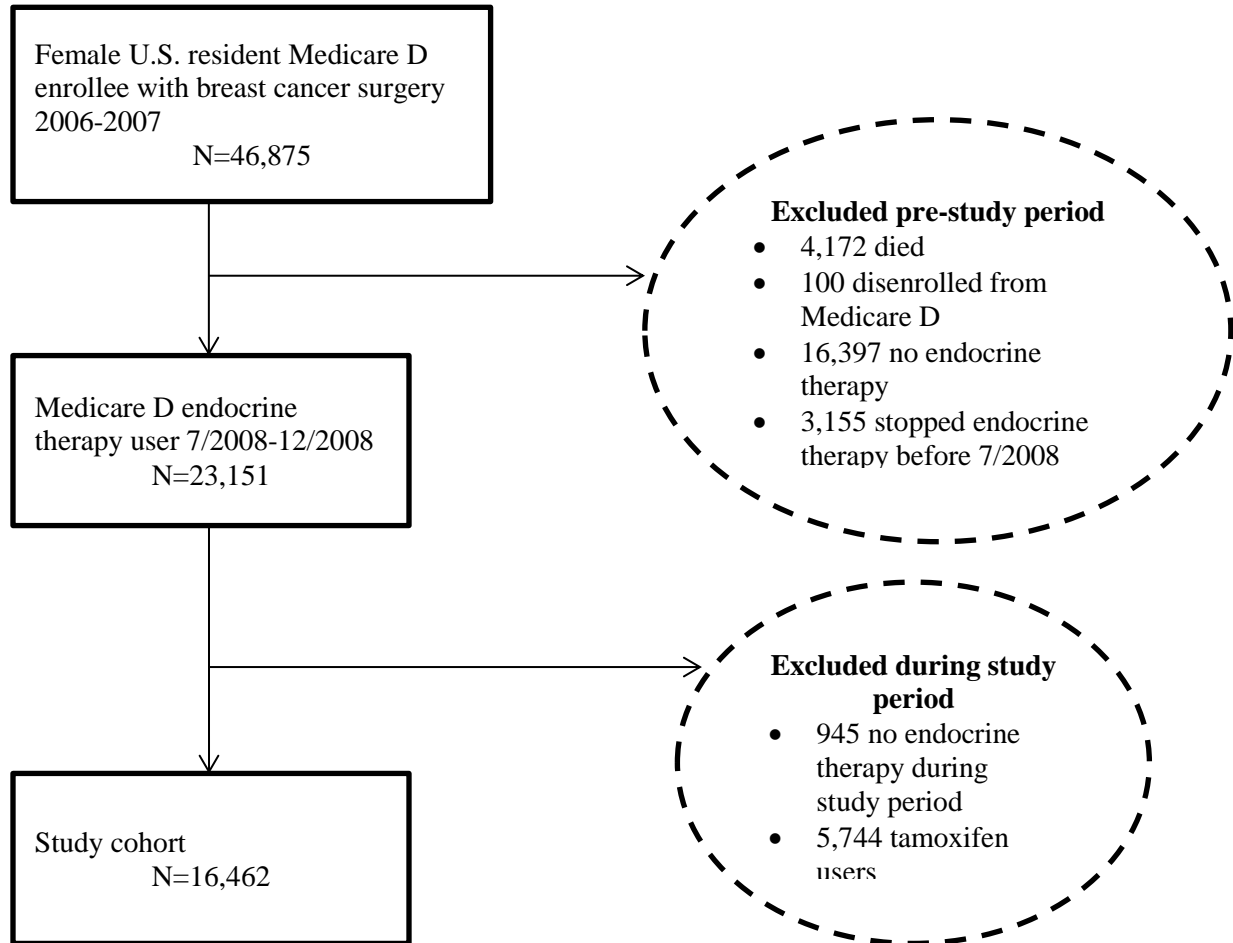

Supplement: supp_djv130_Supplementary_Figure_1.pdf [file supp_djv130_Supplementary_Figure_1.pdf]

**Supplementary Figure 2.** Study Timeline. AI = aromatase inhibitors.

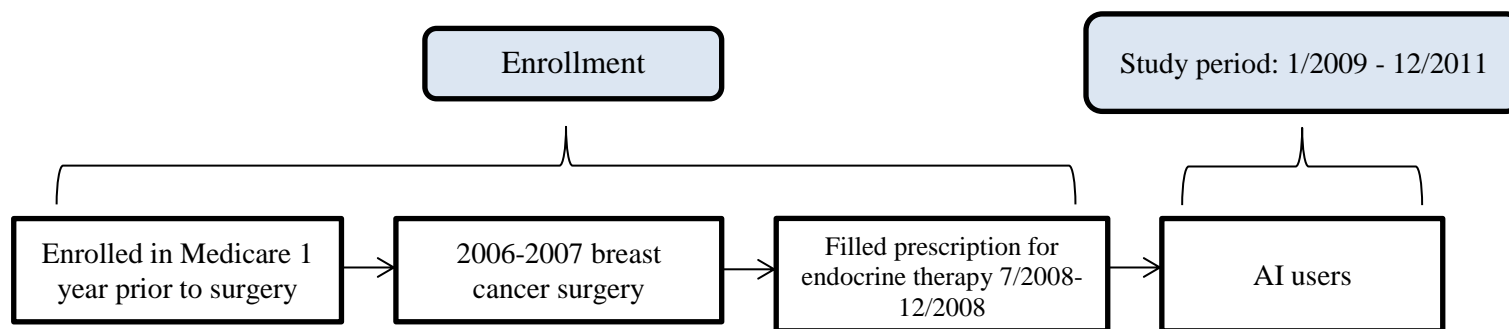

Supplement: supp_djv130_Supplementary_Figure_2.pdf [file supp_djv130_Supplementary_Figure_2.pdf]
